# Supplementary material
Source: PubMed Central journal article supplement (PMC7480365)
Supplement: AEM.01268-20-s0001.pdf [file AEM.01268-20-s0001.pdf]

**SUPPLEMENTAL MATERIAL**

A)

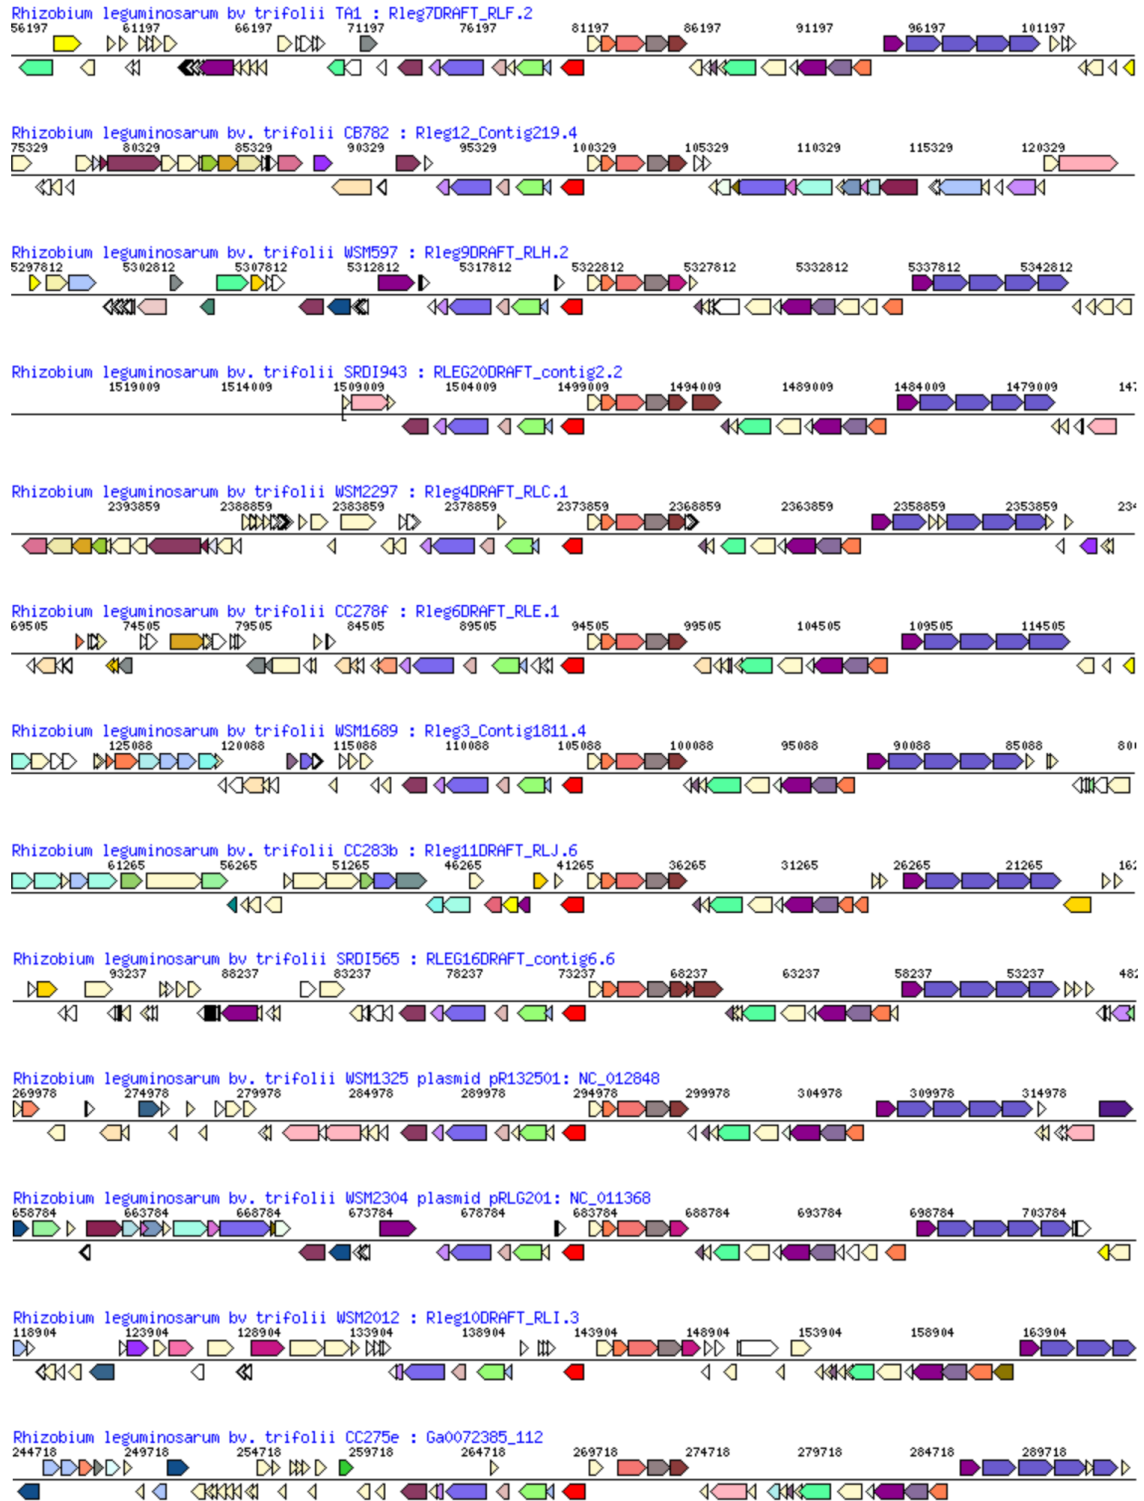

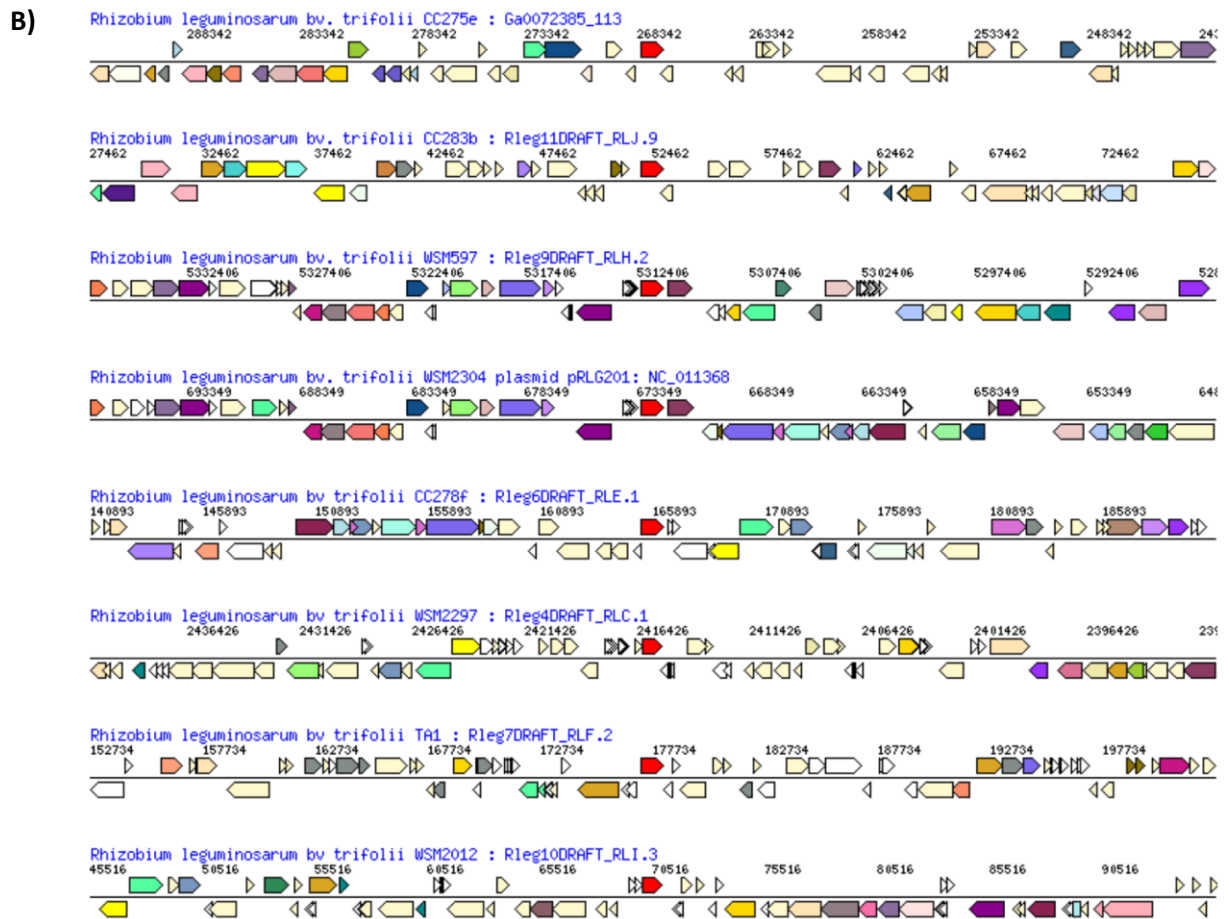

**Fig. S1** Conserved gene neighborhoods surrounding *nodD1* and *nodD2* in 13 strains of *Rhizobium leguminosarum* bv. *trifolii* determined using the IMG database (1, 2). A) Genetic context of 13 *nodD1* genes; B) Genetic context of eight *nodD2* genes. The *nodD* genes are coloured red.

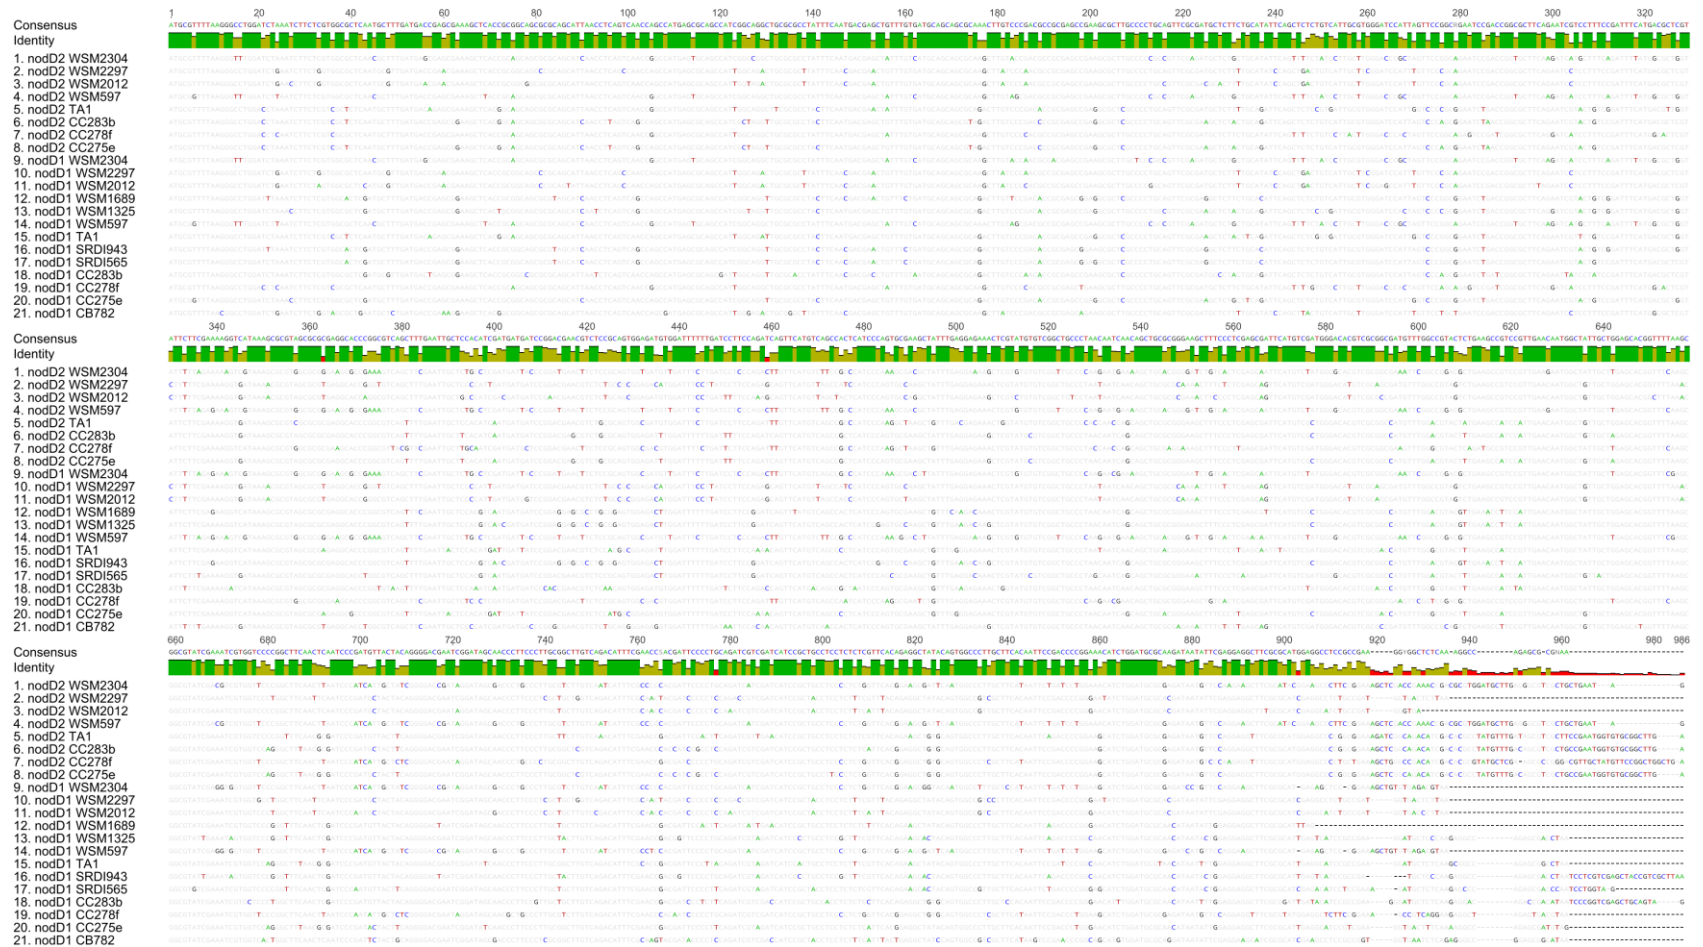

**Fig. S2** Alignment of 21 *nodD1* and *nodD2* nucleotide sequences from 13 strains of *Rhizobium leguminosarum* bv. *trifolii*. The *nodD* and strain of origin is indicated on the left. The top line indicates the consensus identity and the bar below illustrates the level of conservation. Nucleotides that vary from the consensus are highlighted.



c)

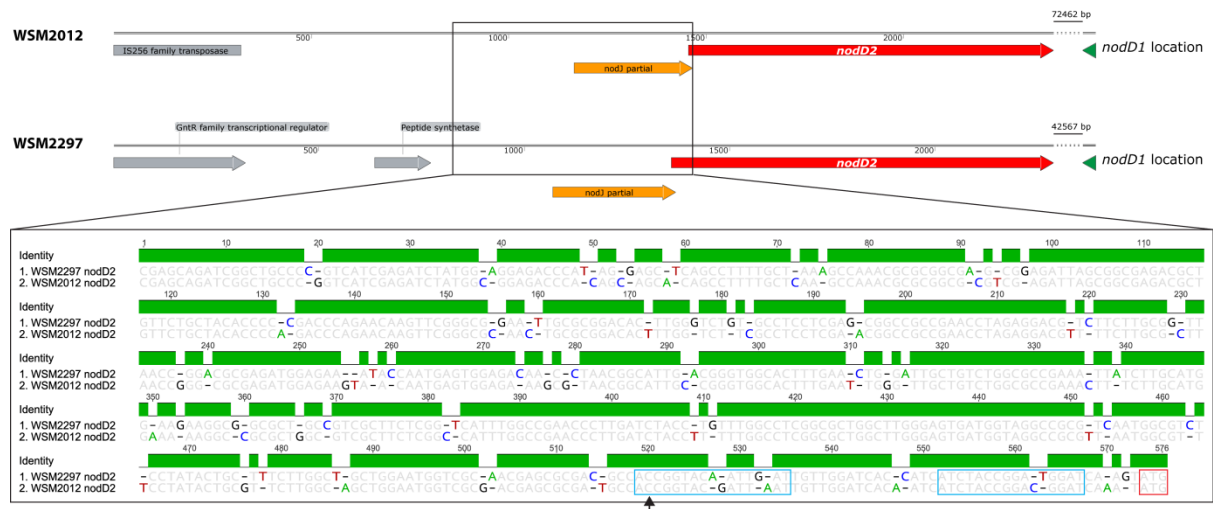

**Fig. S3.** The genetic context and sequence alignments of the *nodD2* upstream promoter regions in the eight *Rhizobium leguminosarum* bv. *trifolii* strains found to encode *nodD2*. There appeared to be three distinct promoter region subgroups, therefore the alignments were separated into three groups across the eight strains to enable interpretation of the conservation between similar regions. The genetic context images were produced by importing sequence from IMG into SnapGene Viewer. The alignments were performed using Geneious and the green bar above sequence indicates conservation. A) *nodD2* upstream regions of strains TA1, CC283b, CC275e, and CC278f; B) *nodD2* upstream regions of strains WSM2304 and WSM597; C) *nodD2* upstream regions of strains WSM2012 and 2297, The *nod*-box motifs are boxed in blue and the base substitution disrupting the LysR motif is indicated by a vertical black arrow. The start codon of *nodD2* is boxed in red.

**Table S1.** Distance matrix of nucleotide similarity for the 21 *nodD* genes in the 13 strains of *Rhizobium leguminosarum* bv. *trifolii*. The highest and lowest percentage identities are indicated in green and orange, respectively.

|               |     |    |    |    |    |    |    |    |    |    |    |    |    |    |    |    |    |    |    |    |  |
|---------------|-----|----|----|----|----|----|----|----|----|----|----|----|----|----|----|----|----|----|----|----|--|
| nodD1_WSM2297 |     |    |    |    |    |    |    |    |    |    |    |    |    |    |    |    |    |    |    |    |  |
| nodD2_WSM2297 | 100 |    |    |    |    |    |    |    |    |    |    |    |    |    |    |    |    |    |    |    |  |
| nodD1_WSM2012 | 97  | 98 |    |    |    |    |    |    |    |    |    |    |    |    |    |    |    |    |    |    |  |
| nodD2_WSM2012 | 94  | 95 | 94 |    |    |    |    |    |    |    |    |    |    |    |    |    |    |    |    |    |  |
| nodD1_CB782   | 90  | 91 | 90 | 90 |    |    |    |    |    |    |    |    |    |    |    |    |    |    |    |    |  |
| nodD1_CC275e  | 85  | 86 | 85 | 86 | 84 |    |    |    |    |    |    |    |    |    |    |    |    |    |    |    |  |
| nodD1_TA1     | 85  | 86 | 85 | 85 | 84 | 95 |    |    |    |    |    |    |    |    |    |    |    |    |    |    |  |
| nodD1_CC283b  | 85  | 85 | 85 | 85 | 83 | 89 | 89 |    |    |    |    |    |    |    |    |    |    |    |    |    |  |
| nodD1_SRDI943 | 84  | 84 | 84 | 84 | 83 | 90 | 90 | 88 |    |    |    |    |    |    |    |    |    |    |    |    |  |
| nodD1_WSM1325 | 84  | 84 | 83 | 84 | 82 | 90 | 91 | 89 | 97 |    |    |    |    |    |    |    |    |    |    |    |  |
| nodD1_WSM1689 | 85  | 85 | 85 | 84 | 84 | 92 | 90 | 90 | 97 | 94 |    |    |    |    |    |    |    |    |    |    |  |
| nodD1_SRDI565 | 86  | 86 | 86 | 85 | 84 | 91 | 90 | 89 | 94 | 92 | 94 |    |    |    |    |    |    |    |    |    |  |
| nodD2_CC275e  | 84  | 85 | 84 | 85 | 83 | 90 | 89 | 86 | 87 | 89 | 90 | 89 |    |    |    |    |    |    |    |    |  |
| nodD2_CC283b  | 85  | 85 | 84 | 86 | 84 | 90 | 90 | 87 | 88 | 90 | 91 | 90 | 99 |    |    |    |    |    |    |    |  |
| nodD2_TA1     | 84  | 84 | 84 | 84 | 82 | 88 | 89 | 86 | 87 | 89 | 91 | 89 | 92 | 92 |    |    |    |    |    |    |  |
| nodD1_CC278f  | 84  | 84 | 84 | 83 | 82 | 83 | 83 | 83 | 83 | 83 | 84 | 84 | 85 | 85 | 86 |    |    |    |    |    |  |
| nodD2_CC278f  | 84  | 84 | 84 | 83 | 82 | 83 | 82 | 81 | 80 | 82 | 84 | 82 | 83 | 83 | 84 | 93 |    |    |    |    |  |
| nodD2_WSM2304 | 78  | 79 | 79 | 79 | 78 | 78 | 78 | 75 | 76 | 78 | 79 | 77 | 77 | 77 | 79 | 87 | 84 |    |    |    |  |
| nodD2_WSM597  | 79  | 79 | 79 | 79 | 78 | 78 | 78 | 76 | 76 | 77 | 79 | 77 | 77 | 77 | 79 | 87 | 84 | 99 |    |    |  |
| nodD1_WSM597  | 78  | 78 | 78 | 78 | 78 | 78 | 78 | 76 | 77 | 77 | 79 | 78 | 79 | 79 | 80 | 87 | 84 | 96 | 97 |    |  |
| nodD1_WSM2304 | 79  | 79 | 79 | 79 | 78 | 79 | 78 | 78 | 78 | 78 | 79 | 78 | 79 | 79 | 81 | 88 | 86 | 95 | 95 | 97 |  |

\* Note values are rounded to the nearest whole number.

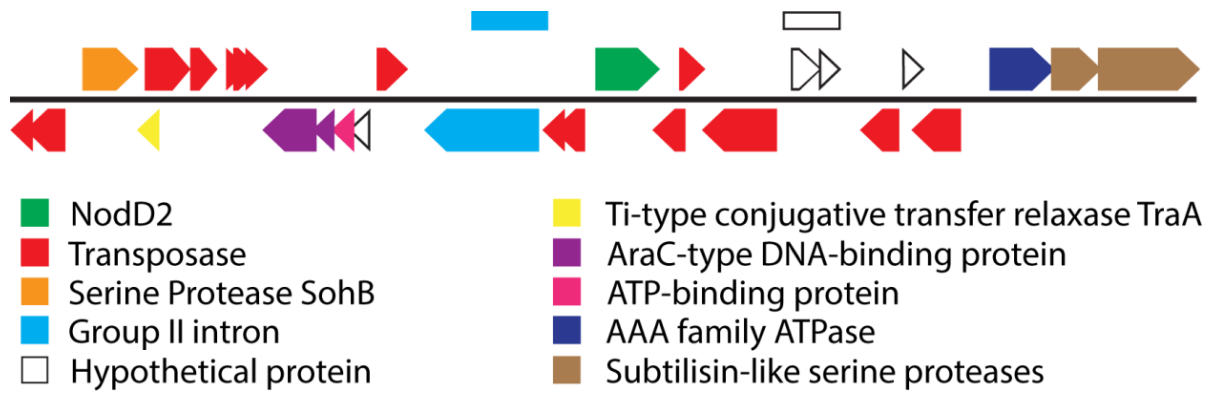

**Fig. S4** The genetic context of *nodD2* in *Rhizobium leguminosarum* bv. *trifolii* strain TA1. Open reading frames surrounding *nodD2*. The boxes above indicate the location of the flanking arms that were designed to facilitate construction of a *nodD2* mutant. The left arm and right arm are indicated by a light blue and white box, respectively. The putative functions of genes surrounding *nodD2* were determined by BLAST search analysis.



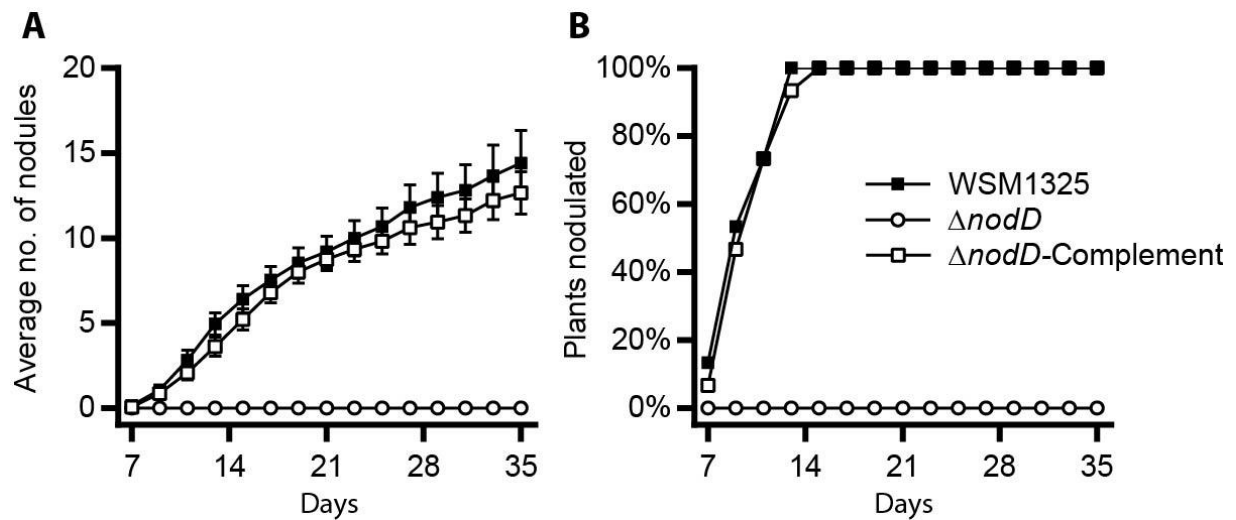

**Fig. S5** Nodulation characteristics of WSM1325, WSM1325 $\Delta nodD$ , and WSM1325 $\Delta nodD$  complemented with *nodD* on white clover. A) Nodulation kinetics showing the average number of nodules per plant. B) The percentage of plants nodulated. The nodulation kinetics was recorded from seven to 35 dpi. Error bars represent the SEM.

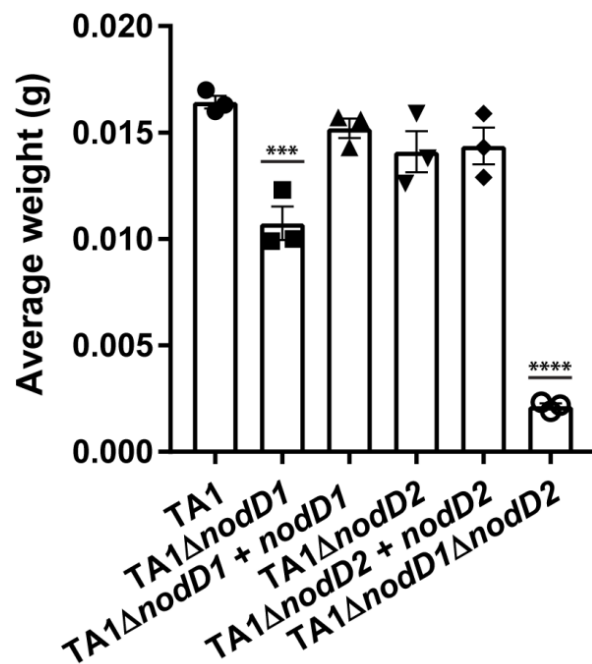

**Fig. S6** The dry shoot weights of white clover inoculated with TA1 *nodD* mutant derivatives at 42 dpi. For every *Rhizobium leguminosarum* bv. *trifolii* strain three biological replicates were each inoculated onto 10 plants. The average shoot weight of the 10 plants per replicate is represented by a symbol. The error bars represent  $\pm$  the SEM. The asterisks indicate significant difference from the wild-type (one-way ANOVA with Dunnett's multiple comparisons post hoc test, \*\*\*  $P < 0.001$ , \*\*\*\*  $P < 0.0001$ ).

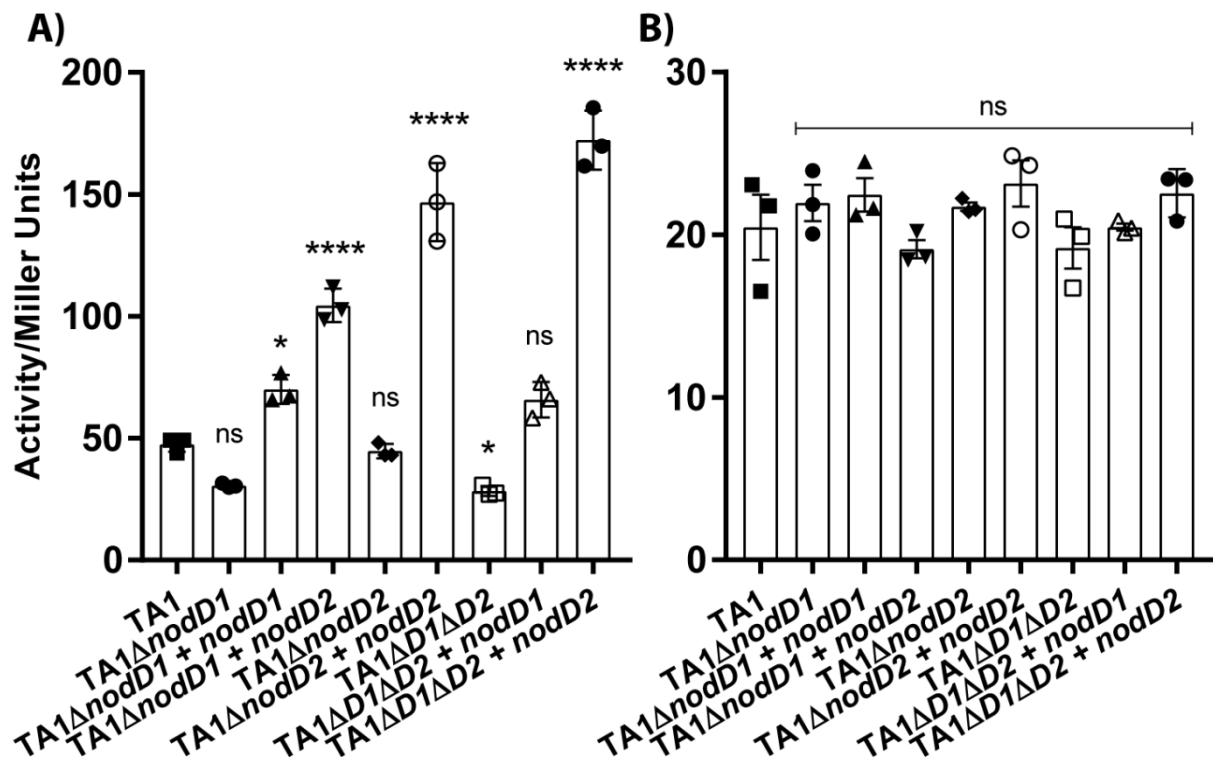

**Fig. S7**  $\beta$ -galactosidase assays showing uninduced expression of the *nodA* and *nodF* promoters in TA1 *nodD* mutant derivatives containing promoter reporter plasmids. A) *nodA* promoter induction. B) *nodF* promoter induction. Each symbol represents a biological replicate. Error bars represent  $\pm$  SEM. The asterisks indicate significant difference from the wild-type (One-way ANOVA with Dunnett's multiple comparisons post hoc test, \*  $P < 0.05$ , \*\*\*\*  $P < 0.0001$ ).

**Table S2.** Distance matrix of amino acid similarity for the 21 NodD proteins in the 13 strains of *Rhizobium leguminosarum* bv. *trifolii*. The highest and lowest percentage identities are indicated in green and orange, respectively.

|               |     |    |    |    |    |    |    |    |    |    |    |    |    |    |    |    |    |    |    |    |  |  |
|---------------|-----|----|----|----|----|----|----|----|----|----|----|----|----|----|----|----|----|----|----|----|--|--|
| nodD1_WSM2297 |     |    |    |    |    |    |    |    |    |    |    |    |    |    |    |    |    |    |    |    |  |  |
| nodD2_WSM2297 | 100 |    |    |    |    |    |    |    |    |    |    |    |    |    |    |    |    |    |    |    |  |  |
| nodD1_WSM2012 | 98  | 98 |    |    |    |    |    |    |    |    |    |    |    |    |    |    |    |    |    |    |  |  |
| nodD1_CB782   | 92  | 92 | 91 |    |    |    |    |    |    |    |    |    |    |    |    |    |    |    |    |    |  |  |
| nodD2_WSM2012 | 95  | 95 | 95 | 92 |    |    |    |    |    |    |    |    |    |    |    |    |    |    |    |    |  |  |
| nodD1_SRDI943 | 88  | 88 | 88 | 83 | 88 |    |    |    |    |    |    |    |    |    |    |    |    |    |    |    |  |  |
| nodD1_WSM1689 | 88  | 88 | 88 | 85 | 88 | 98 |    |    |    |    |    |    |    |    |    |    |    |    |    |    |  |  |
| nodD1_SRDI565 | 87  | 87 | 87 | 83 | 87 | 93 | 97 |    |    |    |    |    |    |    |    |    |    |    |    |    |  |  |
| nodD1_WSM1325 | 88  | 88 | 88 | 84 | 88 | 97 | 98 | 96 |    |    |    |    |    |    |    |    |    |    |    |    |  |  |
| nodD1_CC283b  | 87  | 87 | 87 | 83 | 88 | 88 | 93 | 89 | 91 |    |    |    |    |    |    |    |    |    |    |    |  |  |
| nodD1_CC275e  | 87  | 87 | 87 | 84 | 87 | 89 | 92 | 89 | 91 | 88 |    |    |    |    |    |    |    |    |    |    |  |  |
| nodD1_TA1     | 89  | 89 | 88 | 86 | 89 | 89 | 92 | 90 | 92 | 87 | 97 |    |    |    |    |    |    |    |    |    |  |  |
| nodD2_CC275e  | 85  | 85 | 84 | 82 | 86 | 87 | 91 | 87 | 90 | 85 | 88 | 88 |    |    |    |    |    |    |    |    |  |  |
| nodD2_CC283b  | 86  | 86 | 85 | 83 | 86 | 88 | 92 | 88 | 90 | 86 | 89 | 89 | 99 |    |    |    |    |    |    |    |  |  |
| nodD2_TA1     | 85  | 85 | 85 | 81 | 86 | 86 | 92 | 87 | 89 | 86 | 87 | 86 | 94 | 94 |    |    |    |    |    |    |  |  |
| nodD1_CC278f  | 85  | 85 | 85 | 84 | 85 | 84 | 86 | 85 | 85 | 84 | 85 | 84 | 86 | 86 | 88 |    |    |    |    |    |  |  |
| nodD2_CC278f  | 84  | 84 | 83 | 81 | 83 | 81 | 85 | 83 | 83 | 82 | 83 | 83 | 86 | 86 | 88 | 93 |    |    |    |    |  |  |
| nodD1_WSM597  | 80  | 80 | 79 | 79 | 80 | 78 | 81 | 79 | 78 | 78 | 79 | 80 | 81 | 81 | 82 | 90 | 86 |    |    |    |  |  |
| nodD1_WSM2304 | 80  | 80 | 80 | 79 | 81 | 80 | 82 | 80 | 80 | 80 | 80 | 81 | 82 | 82 | 84 | 91 | 88 | 97 |    |    |  |  |
| nodD2_WSM597  | 80  | 80 | 79 | 77 | 80 | 76 | 81 | 77 | 78 | 76 | 79 | 80 | 80 | 80 | 81 | 88 | 85 | 95 | 94 |    |  |  |
| nodD2_WSM2304 | 80  | 80 | 79 | 77 | 80 | 76 | 81 | 77 | 78 | 76 | 79 | 80 | 80 | 80 | 81 | 88 | 84 | 95 | 95 | 99 |  |  |

\* Note values are rounded to the nearest whole number.

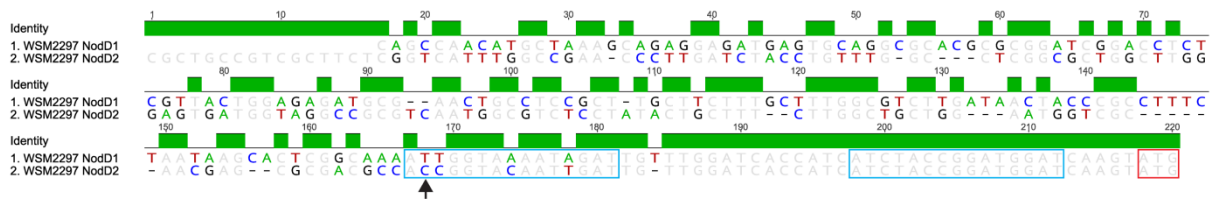

**Fig. S8** Nucleotide sequence alignment of the start codon and preceding 197 bp upstream of *Rhizobium leguminosarum* bv. *trifolii* strain WSM2297 *nodD1* and *nodD2* genes. The *nod*-box motifs are boxed in blue and the base substitution disrupting the LysR motif is indicated by a vertical black arrow. The start codon of *nodD1* and *nodD2* is boxed in red. The P- and D-half *nod*-box motifs are located farthest and closest to the *nodD* start codons, respectively.

A)

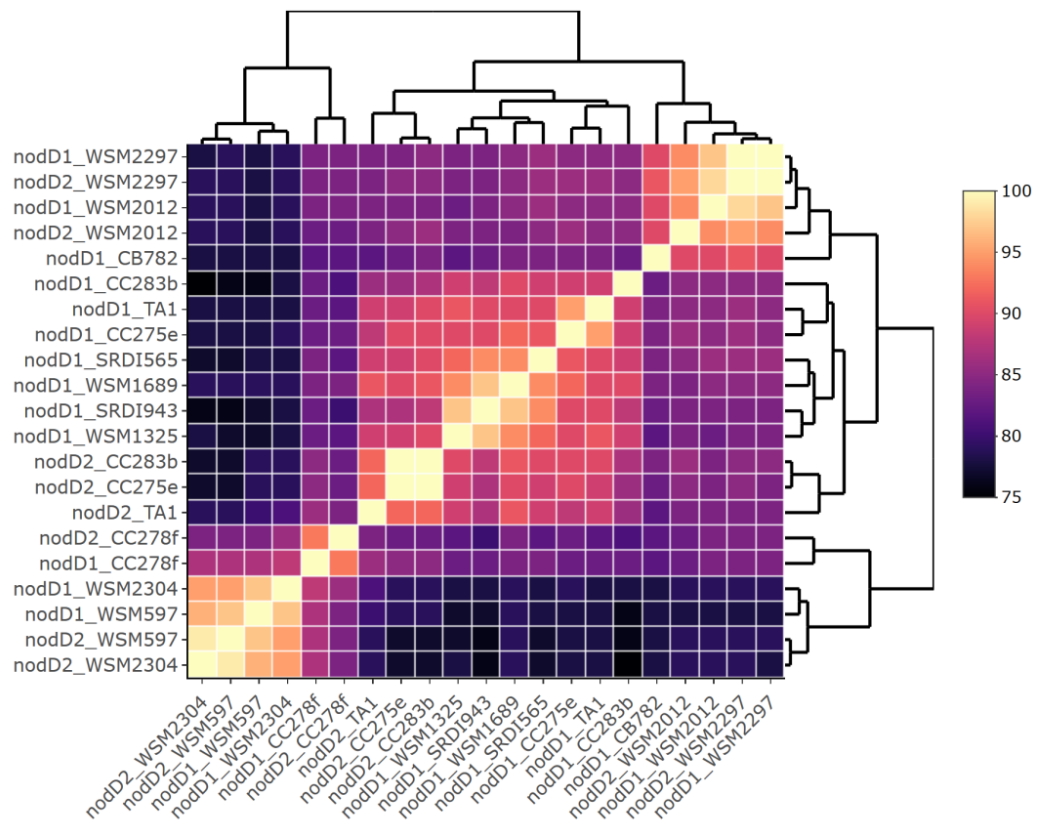

B)

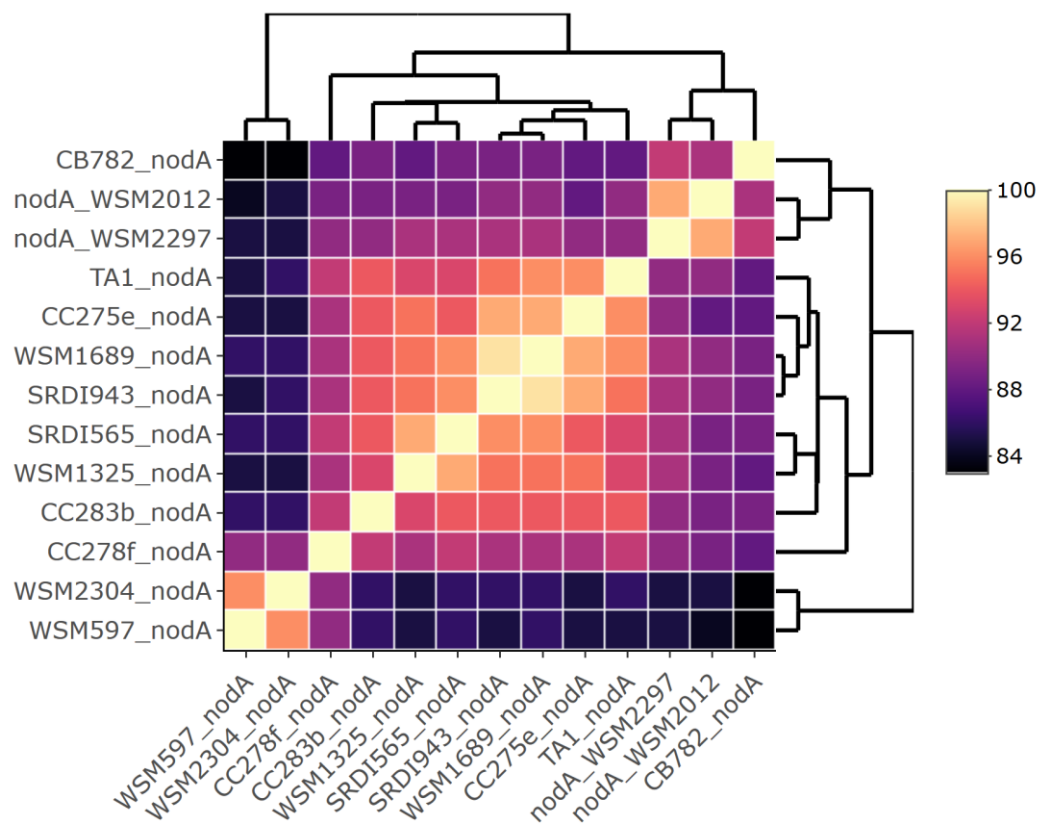

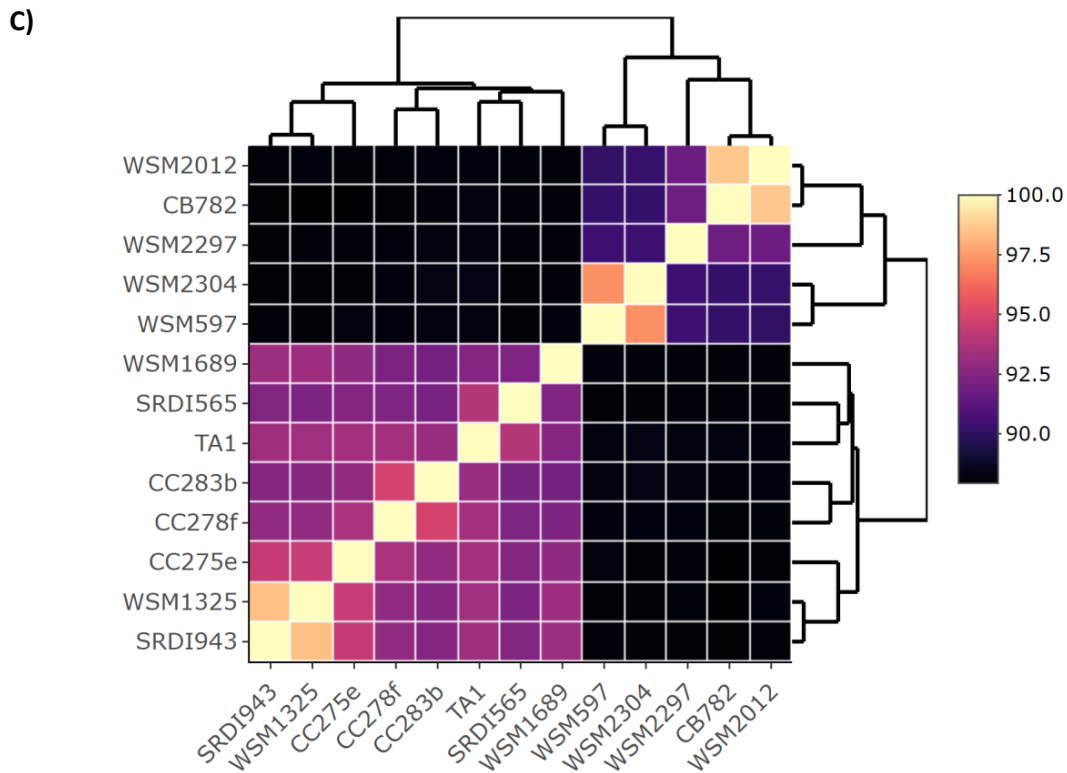

**Fig. S9** Heat maps showing pairwise conservation between whole genome, *nodD*, and *nodA* gene sequences across 13 *Rhizobium leguminosarum* bv. *trifolii* strains. A) Heat map of *nodD1* and *nodD2* nucleotide sequences generated from a distance identity matrix constructed using ClustalX2. Distance values range from 75 – 100%. B) Heat map of *nodA* nucleotide sequences generated from a distance identity matrix constructed using ClustalX2. Distance values range from 83 – 100%. C) Heat map of pairwise whole genome ANI determined using OrthoANI. Distance values range from 87.5 – 100%. The heat maps were plotted using heatmaply (3) in RStudio (4, 5). Dendrograms on the top and right indicate the relatedness based on sequence conservation.





**Table S3.** The IMG database genome ID of the *Rhizobium leguminosarum* strains investigated throughout this study.

| <i>Rhizobium leguminosarum</i> strains                    | IMG Genome ID |
|-----------------------------------------------------------|---------------|
| <b><i>Rhizobium leguminosarum</i> bv. <i>trifolii</i></b> |               |
| <b>strains</b>                                            |               |
| WSM1325                                                   | 644736401     |
| SRDI565                                                   | 2517287029    |
| SRDI943                                                   | 2517093000    |
| WSM1689                                                   | 2510065019    |
| CB782                                                     | 2510065076    |
| TA1                                                       | 2510461076    |
| CC275e                                                    | 2630968330    |
| CC283b                                                    | 2507525018    |
| WSM2297                                                   | 2508501100    |
| WSM2012                                                   | 2509276033    |
| WSM2304                                                   | 643348569     |
| WSM597                                                    | 2509276021    |
| CC278f                                                    | 2509276052    |

***Rlv strains***

|           |            |
|-----------|------------|
| UPM791    | 2859833134 |
| Vc2       | 2515154113 |
| 248       | 2515075009 |
| TOM       | 2516653047 |
| WSM1481   | 2516653077 |
| UPM1131   | 2513237084 |
| BIHB 1217 | 2844454524 |
| VF39      | 2513237103 |
| Vh3       | 2515154114 |
| BIHB 1148 | 2844462476 |
| 128C53    | 2515154115 |
| GB30      | 2513237162 |
| UPM1137   | 2513237085 |
| Ps8       | 2515154116 |
| 3841      | 639633055  |
| WSM1455   | 2509276044 |

---

## REFERENCES

1. Markowitz VM, Chen I-MA, Palaniappan K, Chu K, Szeto E, Grechkin Y, Ratner A, Jacob B, Huang J, Williams P. 2011. IMG: the integrated microbial genomes database and comparative analysis system. *Nucleic Acids Res* 40:D115-D122.
2. Mavromatis K, Chu K, Ivanova N, Hooper SD, Markowitz VM, Kyrpides NC. 2009. Gene context analysis in the Integrated Microbial Genomes (IMG) data management system. *PLoS One* 4:e7979-e7979.
3. Galili T, O'callaghan A, Sidi J, Sievert C. 2017. heatmaply: an R package for creating interactive cluster heatmaps for online publishing. *Bioinformatics* 34:1600-1602.
4. R Core Team. 2013. R: A language and environment for statistical computing.
5. RStudio Team. 2015. RStudio: integrated development for R. RStudio, Inc, Boston, MA
